# Supplementary material
Source: PubMed Central journal article supplement (PMC7167475)
Supplement: JB.00540-19-s0001.pdf [file JB.00540-19-s0001.pdf]

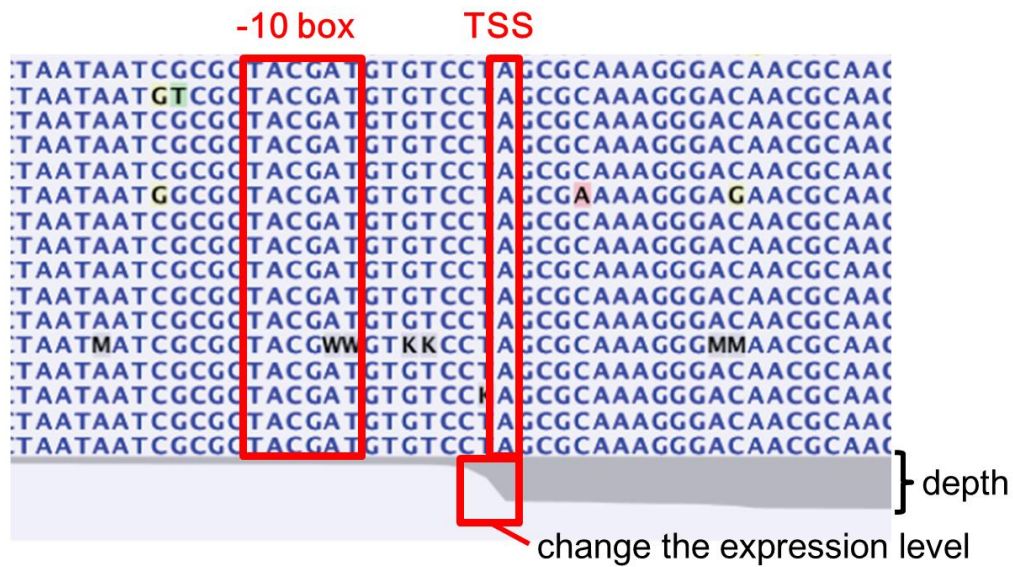

**Fig. S1. An example image of a read depth change.**

The positions showing drastic change of depth were regarded as transcriptional start sites (TSSs).

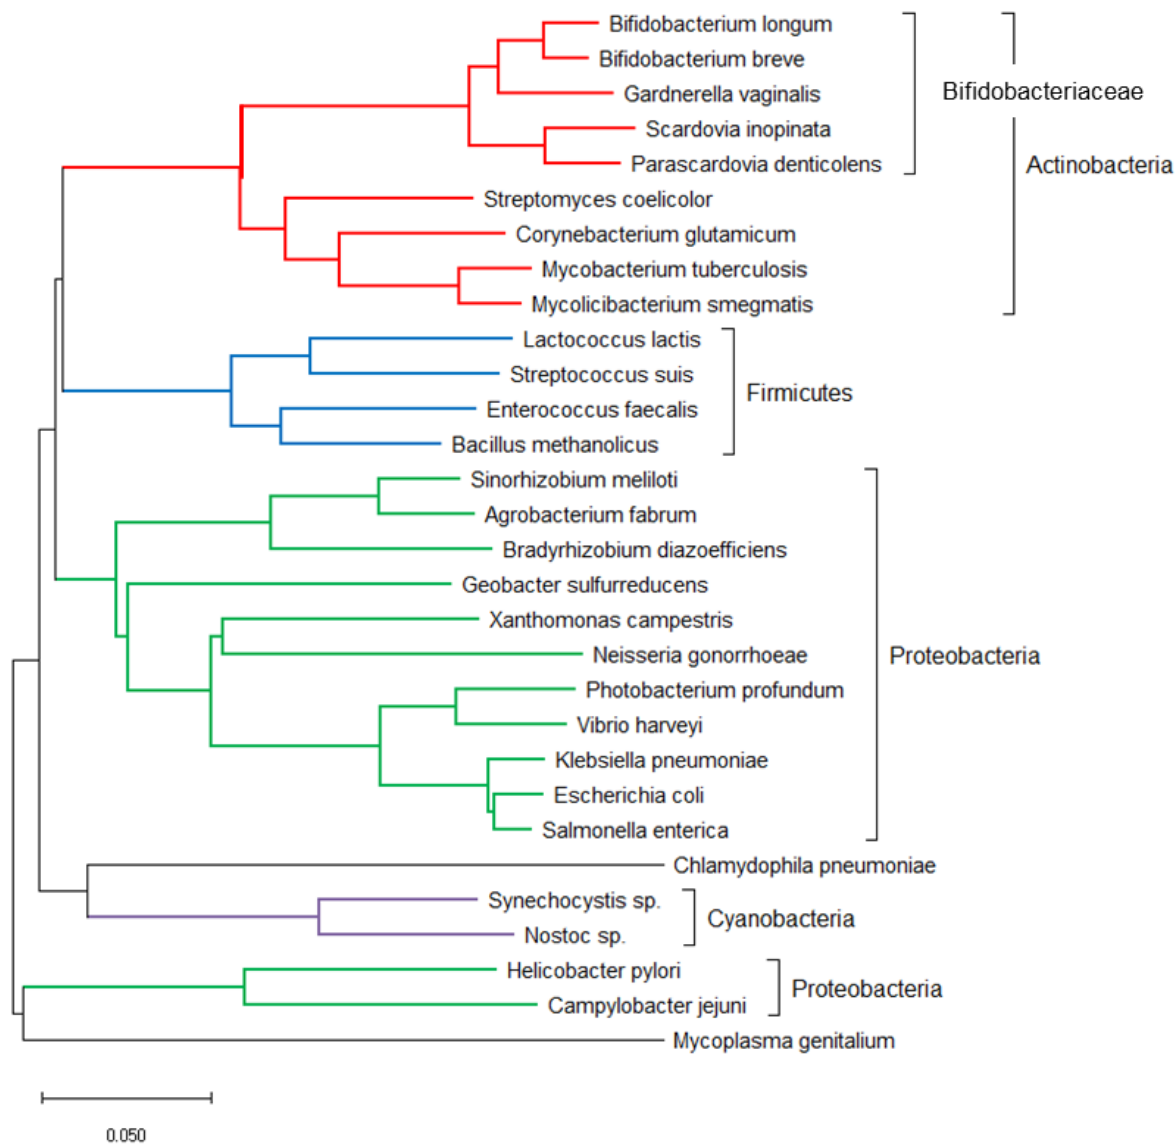

**Fig. S2. The phylogenetic tree based on 16S ribosomal RNA gene sequences.**

The phylogenetic classification of bacteria utilized in Table 1. Four bacteria in the phylum Actinobacteria; *C. glutamicum* ATCC 13032, *M. smegmatis* MC<sup>2</sup> 155, *M. tuberculosis* H37Rv, and *S. coelicolor* A3(2). Four bacteria in the phylum Firmicutes; *B. methanolicus* MGA3, *E. faecalis* V583, *S. suis* P1/7, and *L. lactis subsp. cremoris* MG1363. Two bacteria in the phylum Cyanobacteria; *Nostoc* sp. PCC 7120 and *Synechocystis* sp. PCC 6803. Thirteen bacteria in the phylum Proteobacteria; *G. sulfurreducens* PCA, *C. jejuni subsp. jejuni* NCTC 11168, *H. pylori* 26695, *B. japonicum* USDA110, *A. fabrum* C58, *S. meliloti* 1021, *S. enterica* serovar Typhimurium str. SL1344, *K. pneumoniae subsp. pneumoniae* MGH 78578, *E. coli* K-12 MG1655, *V. harveyi* FDAARGOS\_107, *P. profundum* SS9, *X. campestris pv. vesicatoria* 85-10, and *N. gonorrhoeae* MS11. One bacterium in the phylum Chlamydiae; *C. pneumoniae* CWL029.

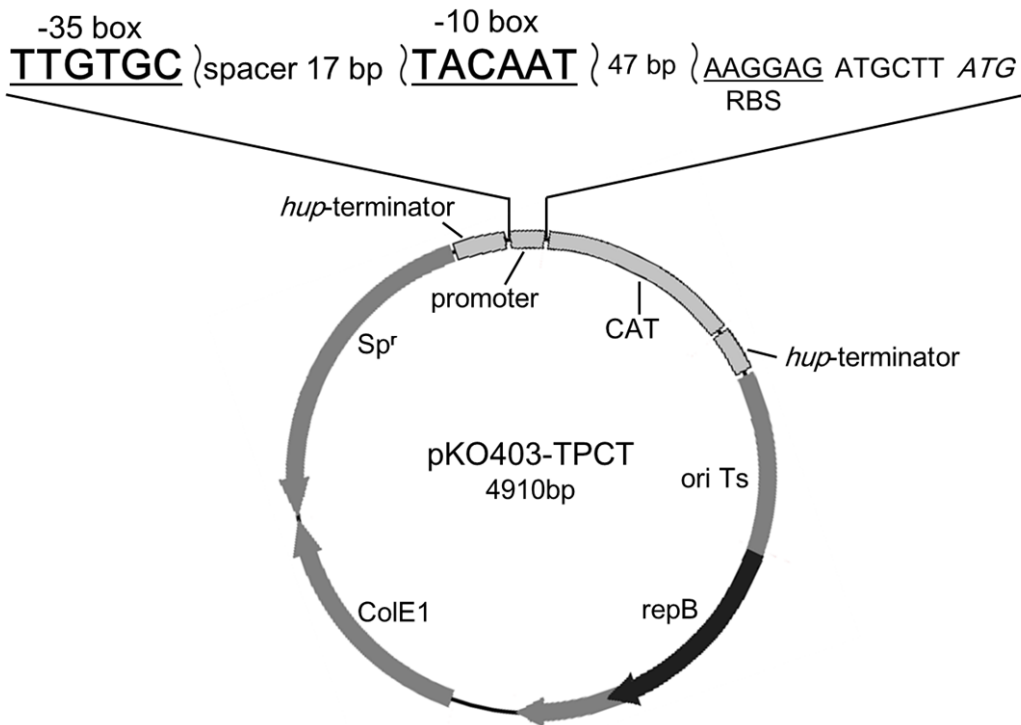

**Fig. S3. The plasmid map of the pKO403-TPCTcon.**

The spacer sequence between the -35 and -10 boxes is in the upstream region of the *CAT* gene. AAGGAG was designed as the RBS and the 17 bp-long sequences as the spacers between the -35 and -10 boxes. *hup*-terminator; terminator of a *hup* gene in *Bifidobacterium longum* NCC2705 strain. *Spr<sup>r</sup>*; a resistance gene of spectinomycin. *ColE1*; a replication origin for *Escherichia coli*. *repB*; a replication origin for *B. longum*. *ori Ts*; a temperature-sensitive replication origin. *CAT*; a gene coding region of chloramphenicol acetyltransferase.

**A**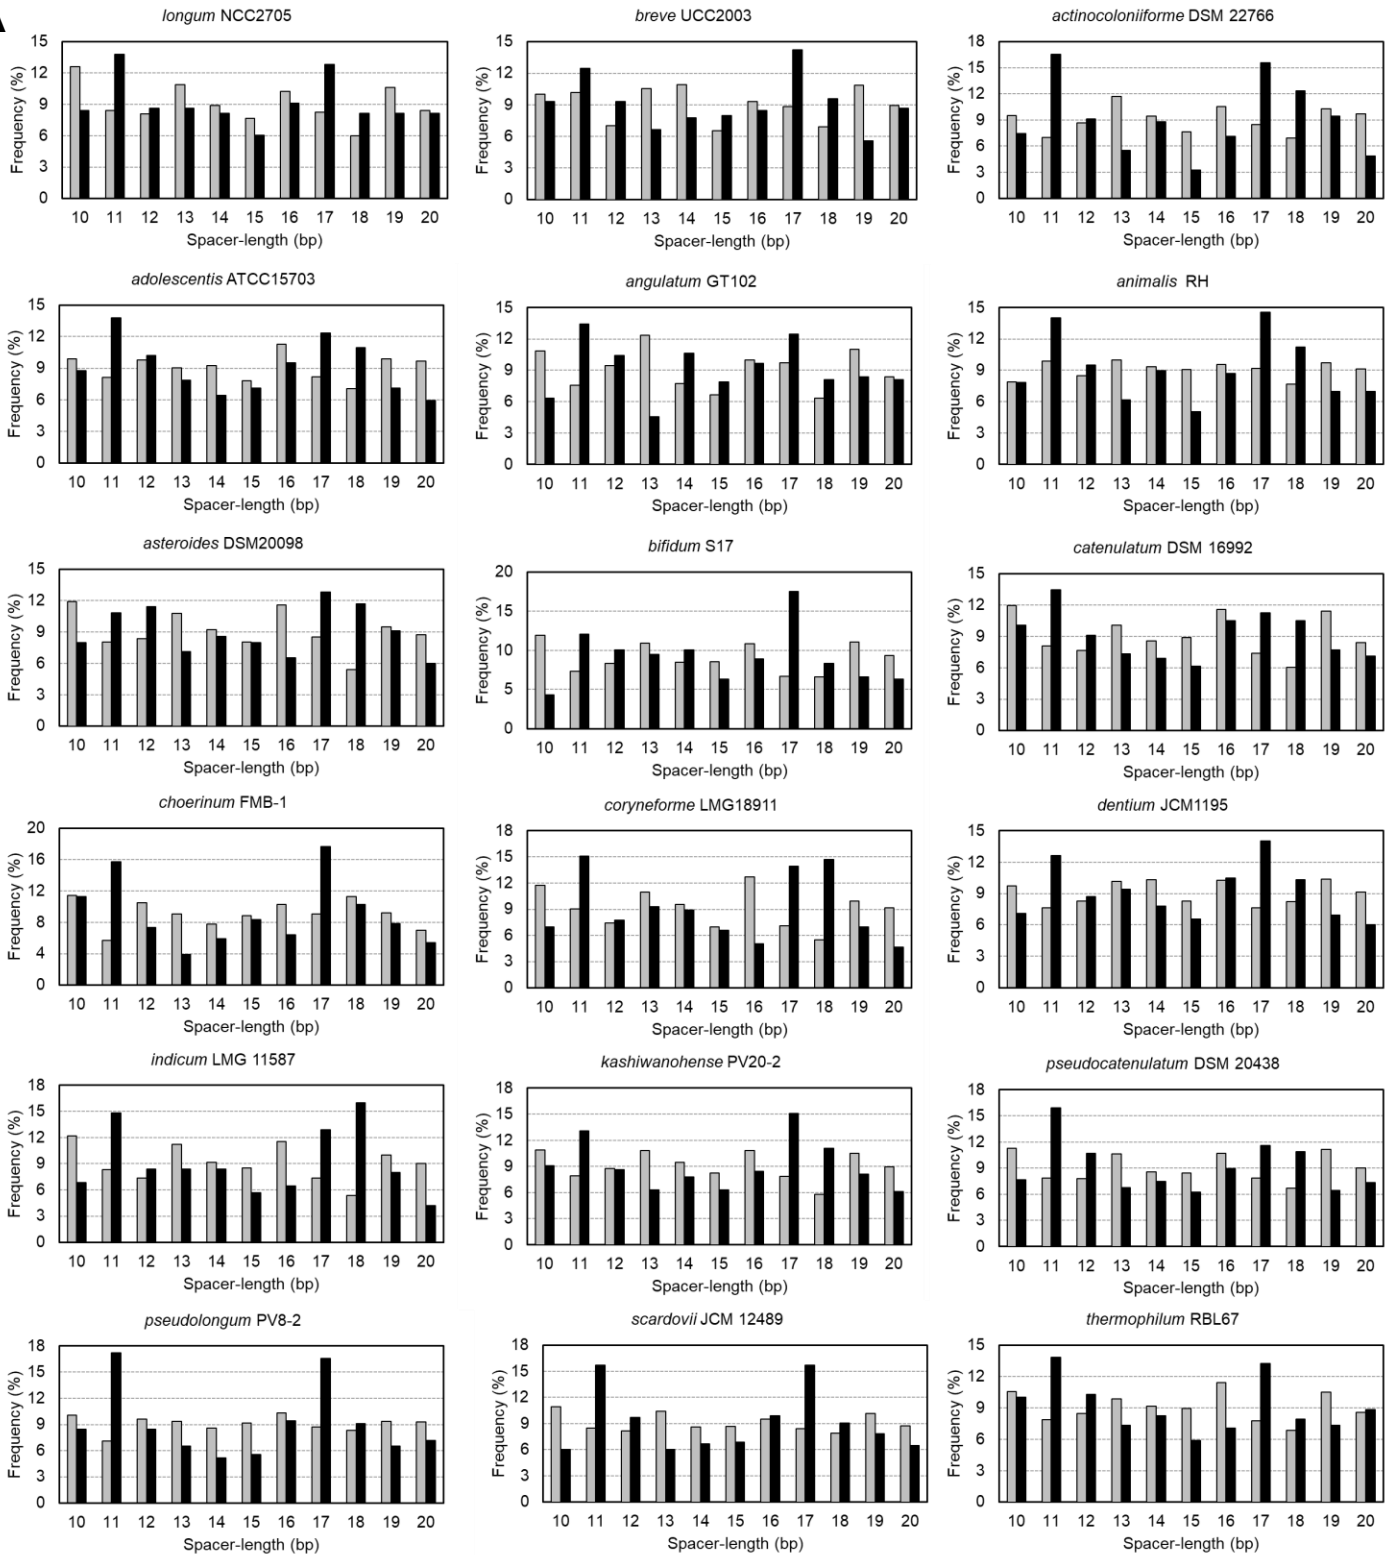

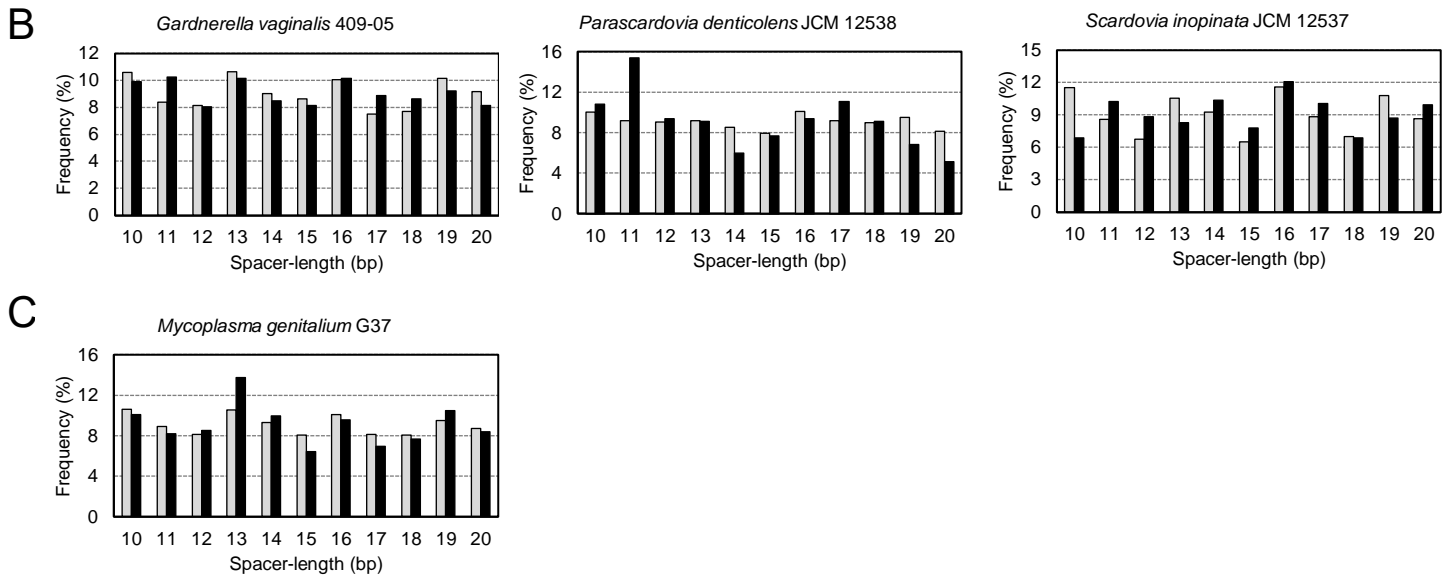

**Fig. S4. Comparison of the frequency of spacer-lengths among bacteria.**

A; Comparison among the genus *Bifidobacterium*. Two peaks of 11 and 17 bp was shown in the genus *Bifidobacterium*. Fig. 2D is based on these values. B; Comparison among the family Bifidobacteriaceae. Two peaks of 11 and 17 bp was shown in *Gardnerella*, *Parascardovia*, and *Scardovia*. C; the frequency of spacer-length in *Mycoplasma*, showing a specific peak in 13 bp. Gray and black bars represent frequencies in other regions and regions 150 bp upstream of genes.

|                            |                                                                                                                         |
|----------------------------|-------------------------------------------------------------------------------------------------------------------------|
| Domain 2_Alternative sigma | K R A R F E Q L A M P A V N A L Y R Q A M R L T N D P D D A Q D L V Q D T - - - F E R G F K A F D S F Q P G S N F E A W |
| Domain 2_primary sigma     | - - K A K D H L L E A N L R L V V S L A K R Y T G R G M L F L D L I Q E G N L G L I R A V E K F D - W K K G F K F S T Y |
|                            | : : * . . : . : * * * . * * : * : : * . . : * * : : * : * . : :                                                         |
| Domain 2_Alternative sigma | M T T I E R N A Y F N Q Y A K A K R R P Q R A N D S T G E Y D D W D I Y D A A E H                                       |
| Domain 2_primary sigma     | A T W W I R Q A I T R A M A D Q A R - T I R V P V H M V E V I - - - - - - - - - -                                       |
|                            | * * * : * . * . * . * . * . *                                                                                           |
| <hr/>                      |                                                                                                                         |
| Domain 4_Alternative sigma | T S D G L K S A E E E Y L D A F A P E E I M A A L A K L S P E R R Q V F I D A A I D G K S Y Q Q - V A D E Q G V K I G T |
| Domain 4_primary sigma     | P S D A V A F S - - - - - L L Q E Q F K Q V L E T L S P - R E A G V I K M R Y G L E D G Q P K T L D D I G R V Y G V     |
|                            | . * * . : : : : * : : . * . * * * * . * . . : . * . * : * * * .                                                         |
| Domain 4_Alternative sigma | V M S R L N R A R T Q L K R E L A S Y A K                                                                               |
| Domain 4_primary sigma     | T R E R I R - - - Q I E S K T M S K L R                                                                                 |
|                            | . . * : . * : : : * : :                                                                                                 |

**Fig. S5. The alignment of sigma factors of the genus *Bifidobacterium*.**

Alternative sigma; alternative sigma factor in *B. longum* NCC2705 (BL1357). Primary sigma; primary sigma factor in *B. longum* NCC2705 (BL1428), corresponding to sigma 70 in *E. coli*. Domain 2 and 4 relate to the recognition of -10 and -35 boxes.

*longum* - - - - - M A T K E T T A T K Q T A E S S - - - - - E E T E T K K K A S S T T T A R K T S A K K  
*breve* - - - - - M A T K E T T A T K Q T A E S S - - - - - E E T E T K K K A S S - T T A R K T S A K K  
*catenulatum* - - - - - M A T K E T T A S M E - - - - - Q A D L T E K T T S T K K A A T R K A S T K  
*kashiwanohense* - - - - - M A T K E T T A S M E - - - - - Q A D L T E K T T S T K K A A T R K A S T K  
*pseudocatenulatum* - - - - - M A T K E T T A S M E - - - - - Q A D L T E K T T S T K K A A T R K A S T K  
*dentium* - - - - - M A T K E T T A S T E - - - - - Q A D L T D K T T S T K K A P S R K A S T K  
*adolescentis* M V Y A S G G I N R R I S L A T K E T T V N T E - - - - - Q T D L T E K T T S G K K A S T R K P A A K  
*thermophilum* - - - - - M A - K E T T A S K K - - - - - D A D Q T E K T T S T R K S A A K K A A T P  
*bifidum* - - - - - M A T K D T M A T T V P D D T D A K T K S E K K G T A A R T A S T A D K K T A A G R K S A A G  
*scardovii* - - - - - M A K K D A K A T T D - - - - - N A E Q L D K A T S T K R K A A S A  
*angulatum* - - - - - M A T K S T T A A E N - - - - - T E Q V Q D E A K A V S A K K A S A T R  
*animalis* - - - - - M V A K E T T S T E K A A K K K A - - - - - S E S A H D E A A V E E K G K T T R R R A S S K  
*choerinum* - - - - - M A T K R T A N T K D K S E D K D - - - - - T S T V E G A S A T K E T S A K P A K R T R - K  
*pseudolongum* - - - - - M W R R N S L V T K Q T S N A A K K S E G K T - - - - - S S T K A D E A Q Q E D E T T A K K P A K - -  
*indicum* - - - - - M A T K D T K S V K T A E V D A E - - - - - E A K T P S T S G K D R S Q K G D K A K  
*coryneforme* - - - - - M A T K D T K S V K T A E V D A E - - - - - E A K T P S T S G K D R S Q K G D K A K  
*asteroides* - - - - - M A T K D T K S A K T A A V D T G - - - - - K G R T S S T A G - - - - - K T K  
*actinocoloniiforme* - - - - - M A A P A K T K A R K V P S K G G A - - - - - K S S S S S T R K A K G S S K S A A S S

*longum* S K S A E - - P S K K T T R K S A A K K T A K K A K D D E L V K D E D T Q V D D E L D D D A E V - - - - -  
*breve* T K D T K G T T A A K T G E K T S R K T S A K K V K K E E E L P Q N D I S Q S D D P E D - - - - -  
*catenulatum* K S A A K K T P A T K T P R K T T A K K S A P A K K - E E E Q I E D D V L D D E D A Q - - - - -  
*kashiwanohense* K S A A K K T P A T K T P R K T T A K K S A P A K K - E E E Q I E N D A L D D E D A Q - - - - -  
*pseudocatenulatum* K S A A K K T T A T K T P R K T T A K K S A P A K K - E E P - L E D D A L D D E D A Q - - - - -  
*dentium* K A A D K K T P A T K T P R K T T A K K K A P A K R Q E I T A N D P D V G E D V L D D E - - - - -  
*adolescentis* K S E S S K T - A T K T S R K T A A K K T S A A K K S K K A E E E E E N L I E Q D A P E D - - - - -  
*thermophilum* A K A T K R S A T S A S A K K T A A A K S A K T S K A A K A S G G E S A A P K A K K K A S R T A T A T K T - - - - -  
*bifidum* K K T S S R S A A S K S T V R E S S A K A A A P A K P T R K R A A S K S A K A V K D E T E E M A - - - - -  
*scardovii* G R K P S R K G A T K K A S D T A R K V T A K E D P I T A N D P D V G E D V L D D E - - - - -  
*angulatum* K T A A A K K T T A K K T A K S G E G T G S V R K K S A A T K S T K N S K T K K R S E E D - - - - -  
*animalis* A S S A K K G S A G K T T K R A T A R K K K D A A E S E S T P A R K T R A A S K T G A K K A I S - - - - -  
*choerinum* S T S A K S G - - - - A R K G T A K K S S A S A Q A E A T K Q P R K S T A K K K T A K K E T T G - - - - -  
*pseudolongum* - - - - - R T T R K S T A K K T A K A A S - - - - - Q T K A P K K T T A R K S A S K - - - - -  
*indicum* T G T R A K G K T A T P T K K S A A K K T A A A K A S S N K S G A T A E K E S V E G S S T G K S K S T G A R K S S A K K  
*coryneforme* T G T R A K G K T A T P T K K S A A K K T A A A K A S S N K S G A T A E K E S V E G S S T G K S K S T G A R K S S A K K  
*asteroides* T A T R S K T S S S K A S H K T S S R K T A T A S T S T A K - - - - -  
*actinocoloniiforme* S K A R S S K T T T K A T V K T K A S K - - - - -

*longum* - - - - - N D D D L D V D D L D E D L D D V D E D - - - - - D  
*breve* - - - - - L D V D N L D E D L D D V E S E - - - - - D  
*catenulatum* - - - - - V D D P D L D D F D D D L D D V D S - - - - -  
*kashiwanohense* - - - - - V D D P L D D F D D D L D D V D S - - - - -  
*pseudocatenulatum* - - - - - V D D A D L D D F D A D L D D V D S - - - - -  
*dentium* - - - - - V D E A D L D D F D D D L D D V D A E - - - - -  
*adolescentis* - - - - - D P V E D A D L D D F D D D L D D V D D E - - - - -  
*thermophilum* - - - - - P R K R T A K R T E P A A A E H D E T Q L D D E D E D I N D E D I E N - - - - F D D L D E  
*bifidum* - - - - - K T E E L A N E D S S D D L D D V Q V D E D G L E N L D D D L D D V D D G G L  
*scardovii* - - - - - D Q D G E A D L D D L E D D E S G L D - - - - -  
*angulatum* - - - - - L D E V D E F D E D A D L D D A K D E D - - - - - L D  
*animalis* - - - - - K S E E I D D E D M I G - - - - - E D V I D E E - - - - - D L D L D E D  
*choerinum* - - - - - H A A Q P E D D E D V M L D D D D E Q I D E D - - - - - S L D L D E D  
*pseudolongum* - - - - - P K D D E P V D D D E V M I D E E D I D L D D - - - - - D L E D V D D  
*indicum* S A A K T G T T K K T S G K S T S T K A G K T T D - K P V D D A I L E D Q T G E D E F D V T D I D E N G T P E S D E L D  
*coryneforme* S A A K T G T T K K T S G K S T S T K A G K T T D N K P V D D A I L E D Q T G E D E F D V T D I D E N G T P E S D E L D  
*asteroides* - - - - - T N R R P A S K T S K K V E E E P I L Q Q E E Q E P D E D L L E D Q E D - - - - - D D Q L D  
*actinocoloniiforme* - - - - - S S E H D E A L E D K A P E E L E E D Q E L D I D D L E E G - - - - -

*longum* A D - - - - D E D L D E D D A D D D D V E D D E D E E E A K S K A P E Q - - - - P K E K G A Y V V S D T D D E E E - N  
*breve* V D D L E D A D A E S D D E D I D D E D D E D E D E G K A A S K A P E Q - - - - P K E K G A Y V V S D T D D E E E - N  
*catenulatum* - D D D D L D D D E E S E P E D D - - - - D D E - - E E R K K P E E - - - - - P K E K G A F V V R D D D D D E - - N  
*kashiwanohense* - D D D D L D D D E E S E P E D D - - - - D D E D E E E R K K P E E - - - - - P K E K G A F V V R D D D D D E - - N  
*pseudocatenulatum* - D D E D L D D D E E S E P E D D - - - - D D E D E E E R K K P E E - - - - - P K E K G A F V V R D D D D D E - - N  
*dentium* - D E A D L D D E D E S E P E D D - - - - E D E D D E E R K K P E E - - - - - P K E K G A F V V R D D D D D E - - N  
*adolescentis* - G E D D L D E D N I D E D D D S E L - - - - D D D E D K R K K P E E - - - - - P K E K G A F V V R D D D D D E - - N  
*thermophilum* G D D P D N L D D D I D S D D E D D E E G E D D S E D D E E N K P K H R E P E V L P K A K G A F V M R D D D D D - - N  
*bifidum* D G D D D I D D E S G E D D D V P E D E D D E G T E P G R K E P E Q - - - - - P K E K G A F V V R D D D D D E - - N  
*scardovii* - - D E D E G D E L D E D S D I A D D E D - - - - - E V K R K E P E T - - - - - P K E K G A F V V R D D D D D E - - N  
*angulatum* V D D V D L D G I N G E S D D D D D D D D D D D D D D D D D D D D D D D D D A P D I S K Q K G A F V V S D D D D D D E - D  
*animalis* L - D A D E N D D D L E D E E S E D E P E P E E D D - D E E P Q A P K E - - - - - P K E K G A F V V S D N D E D D E A L  
*choerinum* L G D V D G Q D V D A D D E D D E S E P E P E E D D E D E E K K P E E - - - - - P K E K G A F V V R D D D D D E - - T  
*pseudolongum* V D D H D H M D D E D D E H D T D D D A V E D D E D D E D P K P E E - - - - - P K A K G A F V V R D D D D D E - - T  
*indicum* K D Q D Q L E D E P G S D D E E E H E A R E V S E E A E E D R K A A H E L A - - - - - A K V K G A F V V D D S E D D E - - S  
*coryneforme* K D Q D Q L E D E P G S D D E E E H E A R E V S E E A E E D R K A A H E L A - - - - - A K V K G A F V V D D S E D D E - - S  
*asteroides* K S E D Q L E D E P D E D D Q E E D E V S R V E D E A E E D R K A A H A L A - - - - - A K V K G A F V V D S D D E - - N  
*actinocoloniiforme* - Q E D Q V E D E E P D G E V D - - - - - G N E D E E E S P K P V V T P - - - - - P D I K G A F V V S D S D D D E - - N

\* \* \* \* \* : \* : \* : \* : \* : \* : \*





|                           | 4.1 |   |   |   |   |   |   |   |   |   |   |   |   |   |   |   |   |   | 4.2 |   |   |   |   |   |   |   |   |   |   |   |   |   |   |   |   |   |   |   |   |   |   |   |   |   |   |   |   |   |   |   |   |   |   |   |   |   |   |   |   |   |
|---------------------------|-----|---|---|---|---|---|---|---|---|---|---|---|---|---|---|---|---|---|-----|---|---|---|---|---|---|---|---|---|---|---|---|---|---|---|---|---|---|---|---|---|---|---|---|---|---|---|---|---|---|---|---|---|---|---|---|---|---|---|---|---|
| <i>longum</i>             | I   | A | P | S | D | A | V | A | F | S | L | L | Q | E | Q | F | K | Q | V   | L | E | T | L | S | P | R | E | A | G | V | I | K | M | R | Y | G | L | E | D | G | Q | P | K | T | L | D | D | I | G | R | V | Y | G | V | T | R | E | R | I | R |
| <i>breve</i>              | I   | A | P | S | D | A | V | A | F | S | L | L | Q | E | Q | F | K | Q | V   | L | E | T | L | S | P | R | E | A | G | V | I | K | M | R | Y | G | L | E | D | G | Q | P | K | T | L | D | D | I | G | R | V | Y | G | V | T | R | E | R | I | R |
| <i>catenulatum</i>        | I   | A | P | S | D | A | V | A | F | S | L | L | Q | E | Q | F | R | Q | V   | L | E | T | L | S | P | R | E | A | G | V | I | K | M | R | Y | G | L | E | D | G | Q | P | K | T | L | D | D | I | G | R | V | Y | G | V | T | R | E | R | I | R |
| <i>kashiwanohense</i>     | I   | A | P | S | D | A | V | A | F | S | L | L | Q | E | Q | F | R | Q | V   | L | E | T | L | S | P | R | E | A | G | V | I | K | M | R | Y | G | L | E | D | G | Q | P | K | T | L | D | D | I | G | R | V | Y | G | V | T | R | E | R | I | R |
| <i>pseudocatenulatum</i>  | I   | A | P | S | D | A | V | A | F | S | L | L | Q | E | Q | F | R | Q | V   | L | E | T | L | S | P | R | E | A | G | V | I | K | M | R | Y | G | L | E | D | G | Q | P | K | T | L | D | D | I | G | R | V | Y | G | V | T | R | E | R | I | R |
| <i>dentium</i>            | I   | A | P | S | D | A | V | A | F | S | L | L | Q | E | Q | F | K | Q | V   | L | E | T | L | S | P | R | E | A | G | V | I | K | M | R | Y | G | L | E | D | G | Q | P | K | T | L | D | D | I | G | R | V | Y | G | V | T | R | E | R | I | R |
| <i>adolescentis</i>       | I   | A | P | S | D | A | V | A | F | S | L | L | Q | E | Q | F | K | Q | V   | L | E | T | L | S | P | R | E | A | G | V | I | K | M | R | Y | G | L | E | D | G | Q | P | K | T | L | D | D | I | G | R | V | Y | G | V | T | R | E | R | I | R |
| <i>thermophilum</i>       | I   | A | P | S | D | A | V | A | F | S | L | L | Q | E | Q | F | K | Q | V   | L | E | T | L | S | P | R | E | A | G | V | I | K | M | R | Y | G | L | E | D | G | Q | P | K | T | L | D | D | I | G | R | V | Y | G | V | T | R | E | R | I | R |
| <i>bifidum</i>            | I   | A | P | S | D | A | V | A | F | S | L | L | Q | E | Q | F | K | Q | V   | L | E | T | L | S | P | R | E | A | G | V | I | K | M | R | Y | G | L | E | D | G | Q | P | K | T | L | D | D | I | G | R | V | Y | G | V | T | R | E | R | I | R |
| <i>scardovii</i>          | I   | A | P | S | D | A | V | A | F | S | L | L | Q | E | Q | F | K | Q | V   | L | E | T | L | S | P | R | E | A | G | V | I | R | M | R | Y | G | L | E | D | G | Q | P | K | T | L | D | D | I | G | R | V | Y | G | V | T | R | E | R | I | R |
| <i>angulatum</i>          | I   | A | P | S | D | A | V | A | F | S | L | L | Q | D | Q | F | K | Q | V   | L | E | T | L | S | P | R | E | S | G | V | I | K | M | R | Y | G | L | E | D | G | Q | P | K | T | L | D | D | I | G | R | V | Y | G | V | T | R | E | R | I | R |
| <i>animalis</i>           | I   | A | P | S | E | A | V | A | F | S | L | L | Q | E | Q | F | R | Q | V   | L | E | T | L | S | P | R | E | A | G | V | I | K | M | R | Y | G | L | E | D | G | Q | P | K | T | L | D | D | I | G | R | V | Y | G | V | T | R | E | R | I | R |
| <i>choerinum</i>          | I   | A | P | S | D | A | V | A | F | S | L | L | Q | E | Q | F | R | Q | V   | L | E | T | L | S | P | R | E | A | G | V | I | K | M | R | Y | G | L | E | D | G | Q | P | K | T | L | D | D | I | G | R | V | Y | G | V | T | R | E | R | I | R |
| <i>pseudolongum</i>       | I   | A | P | S | D | A | V | A | F | S | L | L | Q | E | Q | F | K | Q | V   | L | E | T | L | S | P | R | E | A | G | V | I | K | M | R | Y | G | L | E | D | G | Q | P | K | T | L | D | D | I | G | R | V | Y | G | V | T | R | E | R | I | R |
| <i>indicum</i>            | I   | A | P | S | D | A | V | A | F | S | L | L | Q | E | Q | F | K | Q | V   | L | E | T | L | S | P | R | E | A | G | V | I | K | M | R | Y | G | L | E | D | G | Q | P | K | T | L | D | D | I | G | R | V | Y | G | V | T | R | E | R | I | R |
| <i>coryneforme</i>        | I   | A | P | S | D | A | V | A | F | S | L | L | Q | E | Q | F | K | Q | V   | L | E | T | L | S | P | R | E | A | G | V | I | K | M | R | Y | G | L | E | D | G | Q | P | K | T | L | D | D | I | G | R | V | Y | G | V | T | R | E | R | I | R |
| <i>asteroides</i>         | I   | A | P | S | D | A | V | A | F | S | L | L | Q | E | Q | F | R | Q | V   | L | E | T | L | S | P | R | E | A | G | V | I | K | M | R | Y | G | L | E | D | G | Q | P | K | T | L | D | D | I | G | R | V | Y | G | V | T | R | E | R | I | R |
| <i>actinocoloniiforme</i> | I   | A | P | S | D | A | V | A | F | S | L | L | Q | E | Q | F | K | Q | V   | L | E | T | L | S | P | R | E | A | G | V | I | K | M | R | Y | G | L | E | D | G | Q | P | K | T | L | D | D | I | G | R | V | Y | G | V | T | R | E | R | I | R |

|                           |   |   |   |   |   |   |   |   |   |   |   |   |   |   |   |   |   |   |   |   |   |   |   |   |   |
|---------------------------|---|---|---|---|---|---|---|---|---|---|---|---|---|---|---|---|---|---|---|---|---|---|---|---|---|
| <i>longum</i>             | Q | I | E | S | K | T | M | S | K | L | R | H | P | S | R | S | Q | T | L | R | D | F | L | D | Q |
| <i>breve</i>              | Q | I | E | S | K | T | M | S | K | L | R | H | P | S | R | S | Q | T | L | R | D | F | L | D | Q |
| <i>catenulatum</i>        | Q | I | E | S | K | T | M | S | K | L | R | H | P | S | R | S | Q | T | L | R | D | F | L | D | Q |
| <i>kashiwanohense</i>     | Q | I | E | S | K | T | M | S | K | L | R | H | P | S | R | S | Q | T | L | R | D | F | L | D | Q |
| <i>pseudocatenulatum</i>  | Q | I | E | S | K | T | M | S | K | L | R | H | P | S | R | S | Q | T | L | R | D | F | L | D | Q |
| <i>dentium</i>            | Q | I | E | S | K | T | M | S | K | L | R | H | P | S | R | S | Q | T | L | R | D | F | L | D | Q |
| <i>adolescentis</i>       | Q | I | E | S | K | T | M | S | K | L | R | H | P | S | R | S | Q | T | L | R | D | F | L | D | Q |
| <i>thermophilum</i>       | Q | I | E | S | K | T | M | S | K | L | R | H | P | S | R | S | Q | T | L | R | D | F | L | D | Q |
| <i>bifidum</i>            | Q | I | E | S | K | T | M | S | K | L | R | H | P | S | R | S | Q | T | L | R | D | F | L | D | Q |
| <i>scardovii</i>          | Q | I | E | S | K | T | M | S | K | L | R | H | P | S | R | S | Q | T | L | S | D | F | L | D | Q |
| <i>angulatum</i>          | Q | I | E | S | K | T | M | S | K | L | R | H | P | S | R | S | Q | T | L | R | D | F | L | D | Q |
| <i>animalis</i>           | Q | I | E | S | K | T | M | S | K | L | R | H | P | S | R | S | Q | T | L | R | D | F | L | D | Q |
| <i>choerinum</i>          | Q | I | E | S | K | T | M | S | K | L | R | H | P | S | R | S | Q | T | L | R | D | F | L | D | Q |
| <i>pseudolongum</i>       | Q | I | E | S | K | T | M | S | K | L | R | H | P | S | R | S | Q | T | L | R | D | F | L | D | Q |
| <i>indicum</i>            | Q | I | E | S | K | T | M | S | K | L | R | H | P | S | R | S | Q | T | L | R | D | F | L | D | Q |
| <i>coryneforme</i>        | Q | I | E | S | K | T | M | S | K | L | R | H | P | S | R | S | Q | T | L | R | D | F | L | D | Q |
| <i>asteroides</i>         | Q | I | E | S | K | T | M | S | K | L | R | H | P | S | R | S | Q | T | L | R | D | S | L | D | Q |
| <i>actinocoloniiforme</i> | Q | I | E | S | K | T | M | S | K | L | R | H | P | S | R | S | Q | T | L | R | D | F | L | D | Q |

**Fig. S6. The alignment of sigma factors of the genus *Bifidobacterium*.**

The alignment of primary sigma factors of the 18 bacteria belonging to the genus *Bifidobacterium*. Amino acids in N-terminal regions are colored as the positively charged amino acids K, R, H (blue), the negatively charged amino acids D, E (red), and the non-charged polar amino acids N, S, T, and Q (yellow).

|                                   |                                                                                                                             |     |
|-----------------------------------|-----------------------------------------------------------------------------------------------------------------------------|-----|
| <i>Bifidobacterium longum</i>     | 1 M A T K E T T A T K Q T A E S S E E T E T K K K A S S T T T A R K T S A K K S K S A E S K K T T R K S A A K K T A K K     | 60  |
|                                   | 61 A K D D E L V K D E D T Q V D D E L D D D A E V N D D D L D V D D L D E D L D D V D E D D A D D E D L D E D D A D D D D  | 120 |
|                                   | 121 V E D D E E E A K S A P E Q P K E K                                                                                     | 141 |
| <i>Bifidobacterium breve</i>      | 1 M A T K E T T A T K Q T A E S S E E T E T K K K A S S T T A R K T S A K K T K D T K G T T A A K T G E K T S R K T S A K   | 60  |
|                                   | 61 K V K K E E E L P Q N D I S Q S D D P E D L D V D N L D E D L D D V E S E D V D D L E D A D A E S D D E D I D D E D D E  | 120 |
|                                   | 121 D E D E G K A A S K A P E Q P K E K                                                                                     | 139 |
| <i>Gardnerella vaginalis</i>      | 1 M T S E V G L T V D S D E M Q D D T K P V K T R K A S V A R K T S T R T S S A D S K T R S S R S K K T E D N K I D T E S   | 60  |
|                                   | 61 V S A D A E H D E T E D S V D I E S Q D Q L S I D D P L D D S H L D V G D E H L N L D D L D D I Q P E D I S D V D D L    | 120 |
|                                   | 121 S D I V A D D L D D E E S E D L D E I D D H D E I K H D A P Q V P Q A K                                                 | 157 |
| <i>Scardovia inopinata</i>        | 1 M V A A K K T D A G I G E E P V S S G T T V S K T G K K V K S S A K K S S A K T G A Q K S T A K T S S A K K S T A K T     | 60  |
|                                   | 61 A S T K K T S A K K T A S T R K T V K K K P A V E D D Q K K T S Q S T S A H S A E G K S S Q K T A S K S K K A A S K K    | 120 |
|                                   | 121 S S A I K S A N E E P Q T S S R K T H K K Q D D L S H V P E K G S E S Q T G T H D E D I R S L D S L D A G N Q T D T D I | 180 |
|                                   | 181 P V E D D D I D E G I G P G D E R S N A L D H I D D S V E L D E N G D P I S P D D S D I L A D A E E K D L E E E E D     | 240 |
|                                   | 241 E G R A E E K Q P V E E                                                                                                 | 252 |
| <i>Parascardovia denticolens</i>  | 1 M A T K K T V T D A N P T V V S E I D A S V K G S E V K I S R T K T K K A T G K K A T A S K K T T V K K P S S K A         | 60  |
|                                   | 61 A S A K A T S A K A K S D K T E S G V E P V A E K D V A S T Q K P A K A K K S V A S D K A E K S A E S N K G K S A K T    | 120 |
|                                   | 121 V K S D K T E A E D S A K T V K S T S A T A K A P T K A S R S S T S A K A S S T E A K E A Q S K A A E P T               | 180 |
|                                   | 181 A A K T G K S R K T D E T E K E E G K A S A K K T T S K A S A K K V A A K T S E K T G K S S A K S A E K T E D E D L     | 240 |
|                                   | 241 P A E E A S A E E G K V E E D K V D E S T A S D E D D Q S L N D D D M D G D L G P G S H A V N A L D H I D D S V E L     | 300 |
|                                   | 301 D E N G D P I Q E D D E N I V T D S E E K D L E D E G D E E E A P V E K K P L E E                                       | 342 |
| <i>Mycobacterium tuberculosis</i> | 1 M A T K A S T A T D E P V K R T A T K S P A A S A G A K T G A K R T A A K S A S G S P P A K R A T K P A A R S V K P       | 60  |
|                                   | 61 A S A P Q D T T S T I P K R K T R A A A K S A A K A P S A R G H A T K P R A P K D A Q H E A A T D P E D A L D S V E      | 120 |
|                                   | 121 E L D A E P D L D V E P G E D L D L A A L N L D D L E D D V A P D A D D L D S G D D E D H E D L E A E A V A P G         | 180 |
|                                   | 181 Q T A D D D E E I A E P T E K D K A S                                                                                   | 199 |
| <i>Mycobacterium smegmatis</i>    | 1 M A T K A S P A T E E P V K R T A T K T P A K K A P A K R A A K S A A A K A G G K A P A K K A P A K R A A K G T A A K     | 60  |
|                                   | 61 P E D G V T D D L E V T D D L E A E P G E D L D V E D T L E L D D L D S D D D T A V E D E E E A D A A T P A V A T A      | 120 |
|                                   | 121 K A A D D D I D E P S E K D K A S                                                                                       | 137 |
| <i>Corynebacterium glutamicum</i> | 1 M E S S M V E N N V A K K T V A K K T A R K A A P R V A T P L G V A S E S P I S A T P A R S I D G T S T P V E A           | 60  |
|                                   | 61 A D T I E T T A P A A K A P A A K A P A K K T A R K A P A K K T V A K K A T T A K A A P A T A K D E N A P V D D          | 120 |
|                                   | 121 D E E N L A Q D E Q D F D G D D F V D G I E D E E D E D G V E A L G E E S E D D E E D                                   | 163 |
| <i>Streptomyces coelicolor</i>    | 1 M S A S T S R T L P P E I A E S S V M A L I E R G K A E G Q I A G D D V R R A F E A D Q I P A T Q W K N V L R S L N Q     | 60  |
|                                   | 61 I L E E E G V T L M V S A A E P K R T R K S V A A K S P A K R T A T K A V A A K P V T S R K A T A P A A P A P A T E P    | 120 |
|                                   | 121 A A V E E E A P A K K A A A K K T T A K K A T A K K A A A K K T T A K K E D G E L L E D E A T E E P K A A T E           | 180 |
|                                   | 181 E P E G T E N                                                                                                           | 187 |

**Fig. S7. The amino acid sequences of N-terminal regions of sigma factors of the phylum Actinobacteria.**

Alignment of N-terminal sequences of primary sigma factors of the nine bacteria belonging to the phylum Actinobacteria. Amino acids in N-terminal regions are colored as the positively charged amino acids K, R, H (blue), the negatively charged amino acid D, E (red), and the non-charged polar amino acids N, S, T, and Q (yellow).

**Table S1. The plasmids and primers.**

|                  | Type                                                                                           | Properties                                                                                       | Reference             |            |
|------------------|------------------------------------------------------------------------------------------------|--------------------------------------------------------------------------------------------------|-----------------------|------------|
| Plasmids         | pKO403- <i>lacZ</i>                                                                            | 4,473 bp, Ori <sup>ts</sup> , <i>lacZ</i> , Sp <sup>r</sup>                                      | (1)                   |            |
|                  | pKO403-TPCTcon                                                                                 | 4,913 bp, Ori <sup>ts</sup> , Sp <sup>r</sup> , Cm <sup>r</sup> , TTGTGC-spacer (17 bp)-TACAAT   | This study            |            |
|                  | pKO403-TPCT1-3                                                                                 | 4,913 bp, Ori <sup>ts</sup> , Sp <sup>r</sup> , Cm <sup>r</sup> , vTTGTGC-spacer (17 bp)-TACAAT  | This study            |            |
|                  | pKO403-TPCT4-6                                                                                 | 4,913 bp, Ori <sup>ts</sup> , Sp <sup>r</sup> , Cm <sup>r</sup> , TvTTGTGC-spacer (17 bp)-TACAAT | This study            |            |
|                  | pKO403-TPCT7-9                                                                                 | 4,913 bp, Ori <sup>ts</sup> , Sp <sup>r</sup> , Cm <sup>r</sup> , TThTGC-spacer (17 bp)-TACAAT   | This study            |            |
|                  | pKO403-TPCT10-12                                                                               | 4,913 bp, Ori <sup>ts</sup> , Sp <sup>r</sup> , Cm <sup>r</sup> , TTGvGC-spacer (17 bp)-TACAAT   | This study            |            |
|                  | pKO403-TPCT13-15                                                                               | 4,913 bp, Ori <sup>ts</sup> , Sp <sup>r</sup> , Cm <sup>r</sup> , TTGTThC-spacer (17 bp)-TACAAT  | This study            |            |
|                  | pKO403-TPCT16-18                                                                               | 4,913 bp, Ori <sup>ts</sup> , Sp <sup>r</sup> , Cm <sup>r</sup> , TTGTGd-spacer (17 bp)-TACAAT   | This study            |            |
|                  | pKO403-TPCT19-21                                                                               | 4,913 bp, Ori <sup>ts</sup> , Sp <sup>r</sup> , Cm <sup>r</sup> , TTGTGC-spacer (17 bp)-vACAAT   | This study            |            |
|                  | pKO403-TPCT22-24                                                                               | 4,913 bp, Ori <sup>ts</sup> , Sp <sup>r</sup> , Cm <sup>r</sup> , TTGTGC-spacer (17 bp)-TbCAAT   | This study            |            |
|                  | pKO403-TPCT25-27                                                                               | 4,913 bp, Ori <sup>ts</sup> , Sp <sup>r</sup> , Cm <sup>r</sup> , TTGTGC-spacer (17 bp)-TAvAAT   | This study            |            |
|                  | pKO403-TPCT28-30                                                                               | 4,913 bp, Ori <sup>ts</sup> , Sp <sup>r</sup> , Cm <sup>r</sup> , TTGTGC-spacer (17 bp)-TACbAT   | This study            |            |
|                  | pKO403-TPCT31-33                                                                               | 4,913 bp, Ori <sup>ts</sup> , Sp <sup>r</sup> , Cm <sup>r</sup> , TTGTGC-spacer (17 bp)-TACAbT   | This study            |            |
|                  | pKO403-TPCT34-36                                                                               | 4,913 bp, Ori <sup>ts</sup> , Sp <sup>r</sup> , Cm <sup>r</sup> , TTGTGC-spacer (17 bp)-TACAAv   | This study            |            |
|                  | pK0403-TPCT-10bp                                                                               | 4,906 bp, Ori <sup>ts</sup> , Sp <sup>r</sup> , Cm <sup>r</sup> , TTGTGC-spacer (10 bp)-TATAAT   | This study            |            |
|                  | pK0403-TPCT-11bp                                                                               | 4,907 bp, Ori <sup>ts</sup> , Sp <sup>r</sup> , Cm <sup>r</sup> , TTGTGC-spacer (11 bp)-TATAAT   | This study            |            |
|                  | pK0403-TPCT-12bp                                                                               | 4,908 bp, Ori <sup>ts</sup> , Sp <sup>r</sup> , Cm <sup>r</sup> , TTGTGC-spacer (12 bp)-TATAAT   | This study            |            |
|                  | pK0403-TPCT-15bp                                                                               | 4,911 bp, Ori <sup>ts</sup> , Sp <sup>r</sup> , Cm <sup>r</sup> , TTGTGC-spacer (15 bp)-TATAAT   | This study            |            |
|                  | pK0403-TPCT-16bp                                                                               | 4,912 bp, Ori <sup>ts</sup> , Sp <sup>r</sup> , Cm <sup>r</sup> , TTGTGC-spacer (16 bp)-TATAAT   | This study            |            |
|                  | pK0403-TPCT-18bp                                                                               | 4,914 bp, Ori <sup>ts</sup> , Sp <sup>r</sup> , Cm <sup>r</sup> , TTGTGC-spacer (18 bp)-TATAAT   | This study            |            |
| pK0403-TPCT-19bp | 4,915 bp, Ori <sup>ts</sup> , Sp <sup>r</sup> , Cm <sup>r</sup> , TTGTGC-spacer (19 bp)-TATAAT | This study                                                                                       |                       |            |
| Primers          | Fw_-35                                                                                         | TCACTACAGAGTCGGACTACAATCA                                                                        | This study            |            |
|                  | (5' → 3')                                                                                      | Rv_-35_mu1-3                                                                                     | GCACAbTGCCCGCGTTTTATA | This study |
|                  | Rv_-35_mu4-6                                                                                   | GCACbATGCCCGCGTTTTATA                                                                            | This study            |            |
|                  | Rv_-35_mu7-9                                                                                   | GCAdAATGCCCGCGTTTTATA                                                                            | This study            |            |
|                  | Rv_-35_mu10-12                                                                                 | GCbCAATGCCCGCGTTTTATA                                                                            | This study            |            |
|                  | Rv_-35_mu13-15                                                                                 | GdACAATGCCCGCGTTTTATA                                                                            | This study            |            |
|                  | Rv_-35_mu16-18                                                                                 | hCACAATGCCCGCGTTTTATA                                                                            | This study            |            |
|                  | Rv_-10                                                                                         | GAGCACAATGCCCGCGTTTTA                                                                            | This study            |            |
|                  | Fw_-10_mu1-3                                                                                   | ACTACAGAGTCGGACvACAATCATTGA                                                                      | This study            |            |
|                  | Fw_-10_mu4-6                                                                                   | ACTACAGAGTCGGACTbCAATCATTGA                                                                      | This study            |            |
|                  | Fw_-10_mu7-9                                                                                   | ACTACAGAGTCGGACTAdAATCATTGA                                                                      | This study            |            |
|                  | Fw_-10_mu10-12                                                                                 | ACTACAGAGTCGGACTACbATCATTGA                                                                      | This study            |            |
|                  | Fw_-10_mu13-15                                                                                 | ACTACAGAGTCGGACTACAbTCATTGA                                                                      | This study            |            |
|                  | Fw_-10_mu16-18                                                                                 | ACTACAGAGTCGGACTACAAvCATTGA                                                                      | This study            |            |
|                  | Fw_-10                                                                                         | ACTACAGAGTCGGACTACAATCATTGA                                                                      | This study            |            |

|                |                           |            |
|----------------|---------------------------|------------|
| Fw_spacer19    | GTACCGGACTATAATCATTGATG   | This study |
| Fw_spacer18    | GTACGGACTATAATCATTGATG    | This study |
| Fw_spacer16    | GCGGACTATAATCATTGATG      | This study |
| Fw_spacer15    | CGGACTATAATCATTGATG       | This study |
| Rv_spacer15-19 | TCTGTAGTGAGCACAATG        | This study |
| Fw_spacer10-12 | CGGACTATAATCATTGATGACAACA | This study |
| Rv_spacer12    | GTAGTGAGCACAATGCCC        | This study |
| Rv_spacer11    | TAGTGAGCACAATGCCCG        | This study |
| Rv_spacer10    | AGTGAGCACAATGCCCG         | This study |

---

**Table S2. The bacterial strains of the genus *Bifidobacterium*.**

|                        | <b>Type</b>                                      | <b>Properties</b>                                               | <b>GenBank</b>                              |
|------------------------|--------------------------------------------------|-----------------------------------------------------------------|---------------------------------------------|
| <i>Bifidobacterium</i> | <i>longum</i> NCC2705                            | RNA-Seq sample,<br>Transformation host,<br>Informatics analysis | Nantes Culture<br>Collection,<br>AE014295.3 |
|                        | <i>actinocoloniiforme</i> DSM 22766 <sup>T</sup> | Informatics analysis                                            | CP011786                                    |
|                        | <i>adolescentis</i> ATCC 15703                   | Informatics analysis                                            | AP009256                                    |
|                        | <i>angulatum</i> JCM 1194 <sup>T</sup>           | Informatics analysis                                            | AP012322                                    |
|                        | <i>animalis</i> strain RH                        | Informatics analysis                                            | CP007755                                    |
|                        | <i>asteroides</i> PRL 2011                       | Informatics analysis                                            | CP003325                                    |
|                        | <i>bifidum</i> S17                               | Informatics analysis                                            | CP002220                                    |
|                        | <i>breve</i> UCC 2003                            | Informatics analysis                                            | CP000303                                    |
|                        | <i>catenulatum</i> JCM 1194 <sup>T</sup>         | Informatics analysis                                            | AP012325                                    |
|                        | <i>choerinum</i> FMB-1                           | Informatics analysis                                            | CP018044                                    |
|                        | <i>coryneform</i> strain LMG 18911 <sup>T</sup>  | Informatics analysis                                            | CP007287                                    |
|                        | <i>dentium</i> JCM 1195 <sup>T</sup>             | Informatics analysis                                            | AP012326                                    |
|                        | <i>indicum</i> LMG 11587 <sup>T</sup>            | Informatics analysis                                            | CP006018                                    |
|                        | <i>kashiwanohense</i> PV20-2                     | Informatics analysis                                            | CP007456                                    |
|                        | <i>pseudocatenulatum</i> JCM 1200 <sup>T</sup>   | Informatics analysis                                            | AP012330                                    |
|                        | <i>pseudolongum</i> PV8-2                        | Informatics analysis                                            | CP007457                                    |
|                        | <i>scardovii</i> JCM 12489 <sup>T</sup>          | Informatics analysis                                            | AP012331                                    |
|                        | <i>thermophilum</i> RBL67                        | Informatics analysis                                            | CP004346                                    |

**Table S3. The genes with 11 bp type spacer in the upstream regions.**

| Gene          | Function                                                 |
|---------------|----------------------------------------------------------|
| <i>BL0001</i> | cold-shock protein                                       |
| <i>BL0004</i> | hypothetical protein                                     |
| <i>BL0017</i> | histidyl-tRNA synthetase                                 |
| <i>BL0047</i> | polyphosphate glucokinase                                |
| <i>BL0060</i> | trans-aconitate 2-methyltransferase                      |
| <i>BL0065</i> | elongation factor P                                      |
| <i>BL1292</i> | morphine 6-dehydrogenase                                 |
| <i>BL1422</i> | anthranilate phosphoribosyltransferase                   |
| <i>BL1431</i> | ribokinase                                               |
| <i>BL1432</i> | ATP-dependent helicase II                                |
| <i>BL1444</i> | EamA-like transporter family                             |
| <i>BL0702</i> | excinuclease ABC subunit A                               |
| <i>BL0712</i> | lanine-synthesizing transaminase                         |
| <i>BL0724</i> | threonyl-tRNA synthetase                                 |
| <i>BL0739</i> | UTP-glucose-1-phosphate uridylyltransferase              |
| <i>BL0745</i> | hypothetical protein                                     |
| <i>BL0766</i> | hypothetical protein                                     |
| <i>BL0815</i> | hypothetical protein                                     |
| <i>BL0854</i> | hypothetical protein                                     |
| <i>BL0872</i> | ABC transporter                                          |
| <i>BL0969</i> | acetate kinase                                           |
| <i>BL0992</i> | 30S ribosomal protein S1                                 |
| <i>BL0993</i> | methenyltetrahydrofolate cyclohydrolase                  |
| <i>BL1026</i> | peptidyl-tRNA hydrolase                                  |
| <i>BL1107</i> | phosphoribosylaminoimidazole-succinocarboxamide synthase |
| <i>BL1118</i> | amino acid ABC transporter substrate-binding protein     |
| <i>BL1151</i> | hypothetical protein                                     |
| <i>BL1164</i> | sugar ABC transporter solute-binding protein             |
| <i>BL1175</i> | glucosamine--fructose-6-phosphate aminotransferase       |
| <i>BL1194</i> | 4-hydroxy-tetrahydrodipicolinate reductase               |
| <i>BL1229</i> | tyrosine kinase                                          |
| <i>BL0294</i> | 50S ribosomal protein L32                                |
| <i>BL0319</i> | phospho-2-dehydro-3-deoxyheptonate aldolase              |
| <i>BL0330</i> | 50S ribosomal protein L28                                |
| <i>BL0458</i> | hypothetical protein                                     |
| <i>BL0477</i> | hypothetical protein                                     |

*BL0492* aspartate-semialdehyde dehydrogenase  
*BL0525* LacI-type transcriptional regulator  
*BL0557* hypothetical protein  
*BL0564* modification methylase Sau3AI  
*BL0600* tryptophanyl-tRNA synthetase  
*BL0617* putative hemolysin  
*BL0681* transporter  
*BL0145* hypothetical protein  
*BL0160* MarR-type transcriptional regulator  
*BL0181* alpha-arabinofuranosidase I  
*BL0202* hypothetical protein  
*BL1530* IclR-type transcriptional regulator  
*BL1567* hypothetical protein  
*BL1609* hypothetical protein  
*BL1652* arabinose polymer utilization protein  
*BL1657* two-component system response regulator  
*BL1661* hypothetical protein  
*BL1694* sugar ABC transporter substrate-binding protein  
*BL1723* oligoribonuclease  
*BL1728* prolyl-tRNA synthetase  
*BL1732* methionine aminopeptidase  
*BL1745* hypothetical protein  
*BL1765* MarR-type transcriptional regulator

---

Perl script for spacer analysis

open (IN,"<genome.txt"); #genome.txt is FASTA format file of bacterium whole-genome.

open (OUT,">A\_total-genome.txt");

open (OUT2,">B\_total-genome\_rev.txt");

while (<IN>) {

    s/^>.+\n/\n/;

    print OUT;

    tr/TAGC/ATCG/;

    print OUT2;

}

close(IN);

close(OUT);

close(OUT2);

open (IN, "<cds\_GB.txt"); #cds\_GB.txt is GB format file of bacterium.

open (OUT, ">C\_gene\_locus.txt");

while (\$file = <IN>) {

    if(\$file =~ /^ +CDS +complement\{([0-9]+\.\{([0-9]+\)\})\}{

        \$cds\_comp = \$1;

        print OUT "gene\t";

        print OUT \$cds\_comp;

        print OUT "\t-\n";

    }

    elsif(\$file =~ /^ +CDS +\{([0-9]+\.\{([0-9]+\)\})\}{

        \$cds\_comp = \$1;

        print OUT "gene\t";

        print OUT \$cds\_comp;

        print OUT "\t+\n";

    }

}

close(IN);

close(OUT);

\$X = 150; #\$X is the length of upstream regions you extract.

open (IN,"<A\_total-genome.txt");

open (IN2,"<B\_total-genome\_rev.txt");

open (IN3,"<C\_gene\_locus.txt");

open (OUT,">D\_up\_150\_region.txt");

@genome = <IN>;

chomp @genome;



```

$genome = join("",@genome);
@genome_rev = <IN2>;
chomp @genome_rev;
$genome_rev = join("",@genome_rev);
@line = <IN3>;
chomp @line;
for($i=0;$i<@line;$i++){
    if(@line[$i] =~ /(gene\t)(\d+)(\t)/){
        $start = $2 - $X - 1;
        $sequence = substr($genome,$start,$X);
        print OUT $sequence;
        print OUT "\n";
    }
    if(@line[$i] =~ /(gene\t)(\d+)(\t-)/){
        $start = $2 ;
        $sequence =reverse substr($genome_rev,$start,$X);
        print OUT $sequence;
        print OUT "\n";
    }
}
}
close(IN);
close(IN2);
close(IN3);
close(OUT);

```

```

open(OUT, '> F_spacer-count_upstream.txt');
print OUT "Seq\tNo\n";
open(IN, '< D_up_150_region.txt') or die;
while (<IN>){
$Zero++ while (/TTG[A-Z]{3}TA[A-Z]{3}T/g);
$One++ while (/TTG[A-Z]{4}TA[A-Z]{3}T/g);
$Two++ while (/TTG[A-Z]{5}TA[A-Z]{3}T/g);
$Three++ while (/TTG[A-Z]{6}TA[A-Z]{3}T/g);
$Four++ while (/TTG[A-Z]{7}TA[A-Z]{3}T/g);
$Five++ while (/TTG[A-Z]{8}TA[A-Z]{3}T/g);
$Six++ while (/TTG[A-Z]{9}TA[A-Z]{3}T/g);
$Seven++ while (/TTG[A-Z]{10}TA[A-Z]{3}T/g);
$Eight++ while (/TTG[A-Z]{11}TA[A-Z]{3}T/g);
$Nine++ while (/TTG[A-Z]{12}TA[A-Z]{3}T/g);
$Ten++ while (/TTG[A-Z]{13}TA[A-Z]{3}T/g);

```

```
$Eleven++ while (/TTG[A-Z]{14}TA[A-Z]{3}T/g);
$Twelve++ while (/TTG[A-Z]{15}TA[A-Z]{3}T/g);
$Thirteen++ while (/TTG[A-Z]{16}TA[A-Z]{3}T/g);
$Fourteen++ while (/TTG[A-Z]{17}TA[A-Z]{3}T/g);
$Fifteen++ while (/TTG[A-Z]{18}TA[A-Z]{3}T/g);
$Sixteen++ while (/TTG[A-Z]{19}TA[A-Z]{3}T/g);
$Seventeen++ while (/TTG[A-Z]{20}TA[A-Z]{3}T/g);
$Eighteen++ while (/TTG[A-Z]{21}TA[A-Z]{3}T/g);
$Nineteen++ while (/TTG[A-Z]{22}TA[A-Z]{3}T/g);
$Twenty++ while (/TTG[A-Z]{23}TA[A-Z]{3}T/g);
$Twe1++ while (/TTG[A-Z]{24}TA[A-Z]{3}T/g);
$Twe2++ while (/TTG[A-Z]{25}TA[A-Z]{3}T/g);
$Twe3++ while (/TTG[A-Z]{26}TA[A-Z]{3}T/g);
$Twe4++ while (/TTG[A-Z]{27}TA[A-Z]{3}T/g);
$Twe5++ while (/TTG[A-Z]{28}TA[A-Z]{3}T/g);
}
print OUT "0bp¥t$Zero¥n";
print OUT "1bp¥t$One¥n";
print OUT "2bp¥t$Two¥n";
print OUT "3bp¥t$Three¥n";
print OUT "4bp¥t$Four¥n";
print OUT "5bp¥t$Five¥n";
print OUT "6bp¥t$Six¥n";
print OUT "7bp¥t$Seven¥n";
print OUT "8bp¥t$Eight¥n";
print OUT "9bp¥t$Nine¥n";
print OUT "10bp¥t$Ten¥n";
print OUT "11bp¥t$Eleven¥n";
print OUT "12bp¥t$Twelve¥n";
print OUT "13bp¥t$Thirteen¥n";
print OUT "14bp¥t$Fourteen¥n";
print OUT "15bp¥t$Fifteen¥n";
print OUT "16bp¥t$Sixteen¥n";
print OUT "17bp¥t$Seventeen¥n";
print OUT "18bp¥t$Eighteen¥n";
print OUT "19bp¥t$Nineteen¥n";
print OUT "20bp¥t$Twenty¥n";
print OUT "21bp¥t$Twe1¥n";
print OUT "22bp¥t$Twe2¥n";
print OUT "23bp¥t$Twe3¥n";
```

```
print OUT "24bp\t$Twe4\n";
print OUT "25bp\t$Twe5\n";
close(IN);
close(OUT);
```

```
open (IN,"< A_total-genome.txt");
open (IN2,"< B_total-genome_rev.txt");
open (OUT,"> E_total-genome_both.txt");
@genome = <IN>;
chomp @genome;
$genome = join("",@genome);
@genome_rev = <IN2>;
chomp @genome_rev;
$genome_rev = join("",@genome_rev);
$genome_rev = reverse($genome_rev);
print OUT "$genome\n$genome_rev";
close(IN);
close(IN2);
close(OUT);
```

```
open(OUT, '> G_spacer-count-whole.txt');
print OUT "Seq\tNo\n";
open(IN, '< E_total-genome_both.txt') or die;
while (<IN>){
$Zero++ while (/TTG[A-Z]{3}TA[A-Z]{3}T/g);
$One++ while (/TTG[A-Z]{4}TA[A-Z]{3}T/g);
$Two++ while (/TTG[A-Z]{5}TA[A-Z]{3}T/g);
$Three++ while (/TTG[A-Z]{6}TA[A-Z]{3}T/g);
$Four++ while (/TTG[A-Z]{7}TA[A-Z]{3}T/g);
$Five++ while (/TTG[A-Z]{8}TA[A-Z]{3}T/g);
$Six++ while (/TTG[A-Z]{9}TA[A-Z]{3}T/g);
$Seven++ while (/TTG[A-Z]{10}TA[A-Z]{3}T/g);
$Eight++ while (/TTG[A-Z]{11}TA[A-Z]{3}T/g);
$Nine++ while (/TTG[A-Z]{12}TA[A-Z]{3}T/g);
$Ten++ while (/TTG[A-Z]{13}TA[A-Z]{3}T/g);
$Eleven++ while (/TTG[A-Z]{14}TA[A-Z]{3}T/g);
$Twelve++ while (/TTG[A-Z]{15}TA[A-Z]{3}T/g);
$Thirteen++ while (/TTG[A-Z]{16}TA[A-Z]{3}T/g);
$Fourteen++ while (/TTG[A-Z]{17}TA[A-Z]{3}T/g);
$Fifteen++ while (/TTG[A-Z]{18}TA[A-Z]{3}T/g);
```

```
$Sixteen++ while (/TTG[A-Z]{19}TA[A-Z]{3}T/g);
$Seventeen++ while (/TTG[A-Z]{20}TA[A-Z]{3}T/g);
$Eighteen++ while (/TTG[A-Z]{21}TA[A-Z]{3}T/g);
$Nineteen++ while (/TTG[A-Z]{22}TA[A-Z]{3}T/g);
$Twenty++ while (/TTG[A-Z]{23}TA[A-Z]{3}T/g);
$Twe1++ while (/TTG[A-Z]{24}TA[A-Z]{3}T/g);
$Twe2++ while (/TTG[A-Z]{25}TA[A-Z]{3}T/g);
$Twe3++ while (/TTG[A-Z]{26}TA[A-Z]{3}T/g);
$Twe4++ while (/TTG[A-Z]{27}TA[A-Z]{3}T/g);
$Twe5++ while (/TTG[A-Z]{28}TA[A-Z]{3}T/g);
}
print OUT "0bp\t$Zero\n";
print OUT "1bp\t$One\n";
print OUT "2bp\t$Two\n";
print OUT "3bp\t$Three\n";
print OUT "4bp\t$Four\n";
print OUT "5bp\t$Five\n";
print OUT "6bp\t$Six\n";
print OUT "7bp\t$Seven\n";
print OUT "8bp\t$Eight\n";
print OUT "9bp\t$Nine\n";
print OUT "10bp\t$Ten\n";
print OUT "11bp\t$Eleven\n";
print OUT "12bp\t$Twelve\n";
print OUT "13bp\t$Thirteen\n";
print OUT "14bp\t$Fourteen\n";
print OUT "15bp\t$Fifteen\n";
print OUT "16bp\t$Sixteen\n";
print OUT "17bp\t$Seventeen\n";
print OUT "18bp\t$Eighteen\n";
print OUT "19bp\t$Nineteen\n";
print OUT "20bp\t$Twenty\n";
print OUT "21bp\t$Twe1\n";
print OUT "22bp\t$Twe2\n";
print OUT "23bp\t$Twe3\n";
print OUT "24bp\t$Twe4\n";
print OUT "25bp\t$Twe5\n";
close(IN);
close(OUT);
```

## REFERENCE

1. Sakaguchi K, He J, Tani S, Kano Y, Suzuki T. 2012. A targeted gene knockout method using a newly constructed temperature-sensitive plasmid mediated homologous recombination in *Bifidobacterium longum*. Appl Microbiol Biotechnol 95:499–509.
